# Supplementary material
Source: PubMed Central journal article supplement (PMC3750742)
Supplement: NIHMS498380-supplement-01.pdf [file NIHMS498380-supplement-01.pdf]

## Supplemental Information

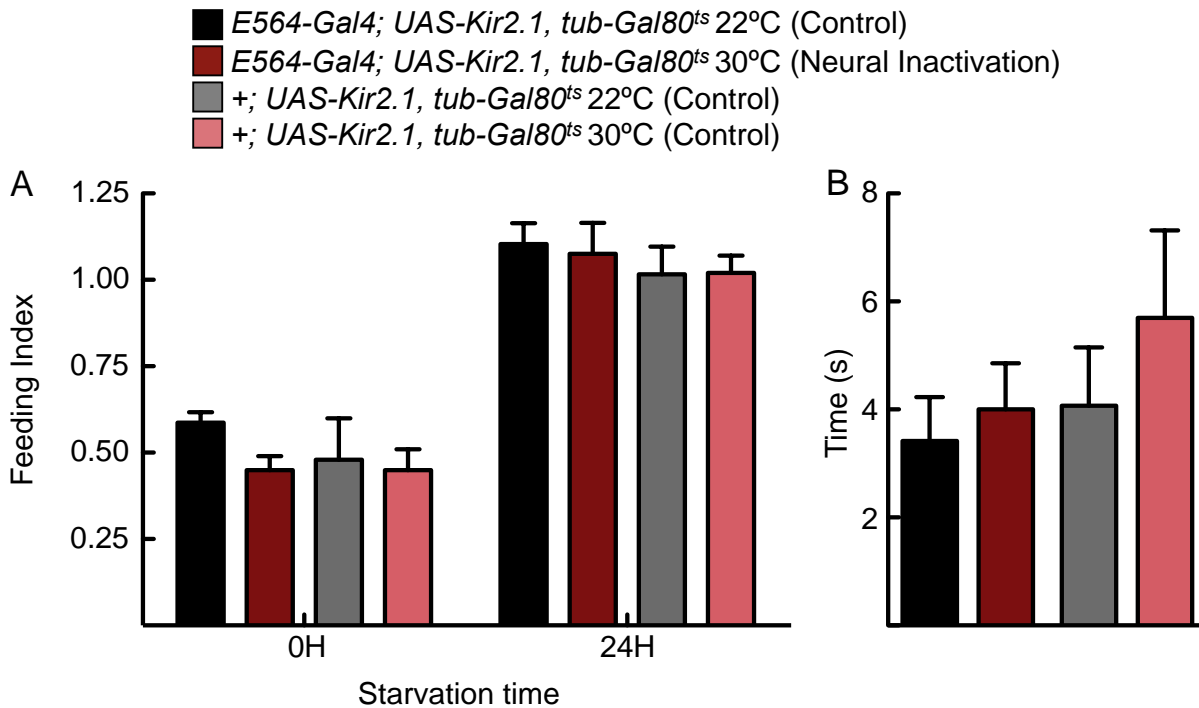

**Figure S1: Inactivating E564 neurons does not alter sucrose consumption, related to Figure 1.**

A. *E564-Gal4, UAS-Kir2.1, tub-Gal80<sup>ts</sup>* and control flies were allowed to freely feed on 200mM sucrose spiked with blue dye for 30 minutes in both satiated (0H starvation) and deprived (24H starvation) conditions. Flies not feeding are given a score of 0, those with less than half of their abdomen full of blue dye are given a score of 1, and those with greater than half are given a score of 2. All flies consumed similar amounts of 200mM sucrose when Kir2.1 expression is induced (30°C) or not induced (22°C). n=3 groups of 30-60 flies each per genotype, mean±SEM, ANOVA with post-hoc Tukey test, ns.

B. The same genotypes used in A were mounted on glass slides and stimulated with 1M sucrose. Each fly was allowed to drink until it would no longer consume sucrose after 10 consecutive stimulations. Sucrose consumption time was not significantly different. n=27-36 flies per genotype, mean ± SEM, ANOVA with post-hoc Tukey test, ns.

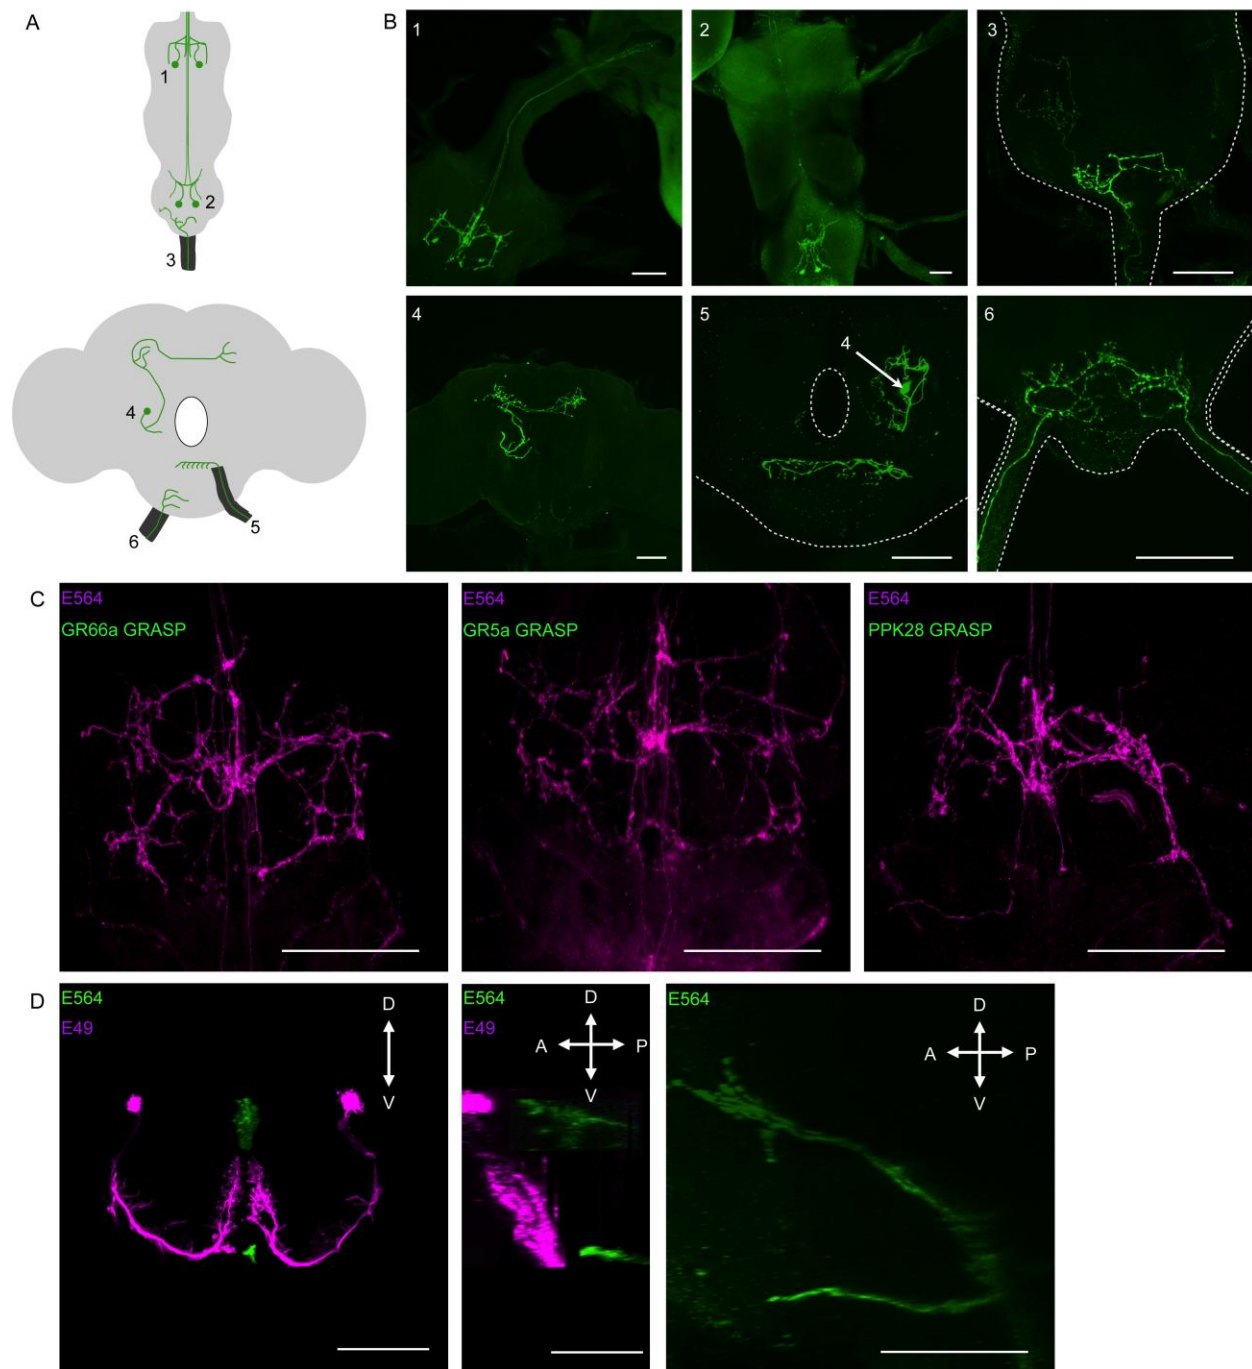

**Figure S2: The 6 cell types in the *E564-Gal4* line and proximity of  $PER_{in}$  to gustatory and motor fibers, related to Figure 2.**

A. Schematic of the ventral nerve cord (VNC, top) and central brain (bottom). Each cell type in the *E564-Gal4* line is illustrated in green.

B. Confocal images of each of the cell types. Each panel corresponds to the cell type number shown in A, Figure 2A-C and Figure 7C. The top 3 panels show the VNC and the bottom 3 show the brain. In panel 3, the border of the abdominal ganglion and nerve are outlined. In panel 5, the

SOG and the esophagus borders are outlined. In panel 6, the SOG and the labeller nerves are outlined. Flies were generated using the mosaic method as presented in Figure 2 and are the same genotype.

C. Contacts between gustatory dendrites and PER<sub>in</sub> were examined by expressing membrane-tethered split GFP fragments in the processes, by the GRASP method as previously described (Gordon and Scott, 2009). PER<sub>in</sub> is shown in magenta. No GRASP punctae (green) were observed. See Videos S1 and S2 showing 3D representations of sensory and PER<sub>in</sub> projections in the ventral nerve cord.

D. Proximity of PER<sub>in</sub> to motor neurons that drive proboscis extension was examined by double labeling PER<sub>in</sub> and motor fibers. Cell-specific labeling was achieved by photoactivation of pa-GFP using *E564-Gal4*, *E49-Gal4*, *UAS-paGFP* flies. Left panel shows frontal view of PER<sub>in</sub> in green and proboscis motor neurons in magenta. Middle panel show sagittal view and right panel shows the sagittal view of PER<sub>in</sub> alone. There is no overlap in projections. Photoactivation of GFP was performed essentially as previously described (Ruta et al., 2010). Dissected brain plus ganglia preparations were secured to the bottom of a plastic dish in AHL. PER<sub>in</sub> axons were photoactivated through the cervical connective, and E49 motor neurons were photoactivated at the cell body on the surface of the SOG using a 710nm two-photon laser. The anterior portion of the SOG was then imaged using a 925nm two-photon laser. Erroneous photoactivation and background was removed from the image by masking the motor neurons and PER<sub>in</sub> axons. E49 motor neurons were then pseudocolored using ImageJ to enhance contrast. All scale bars are 50µm.

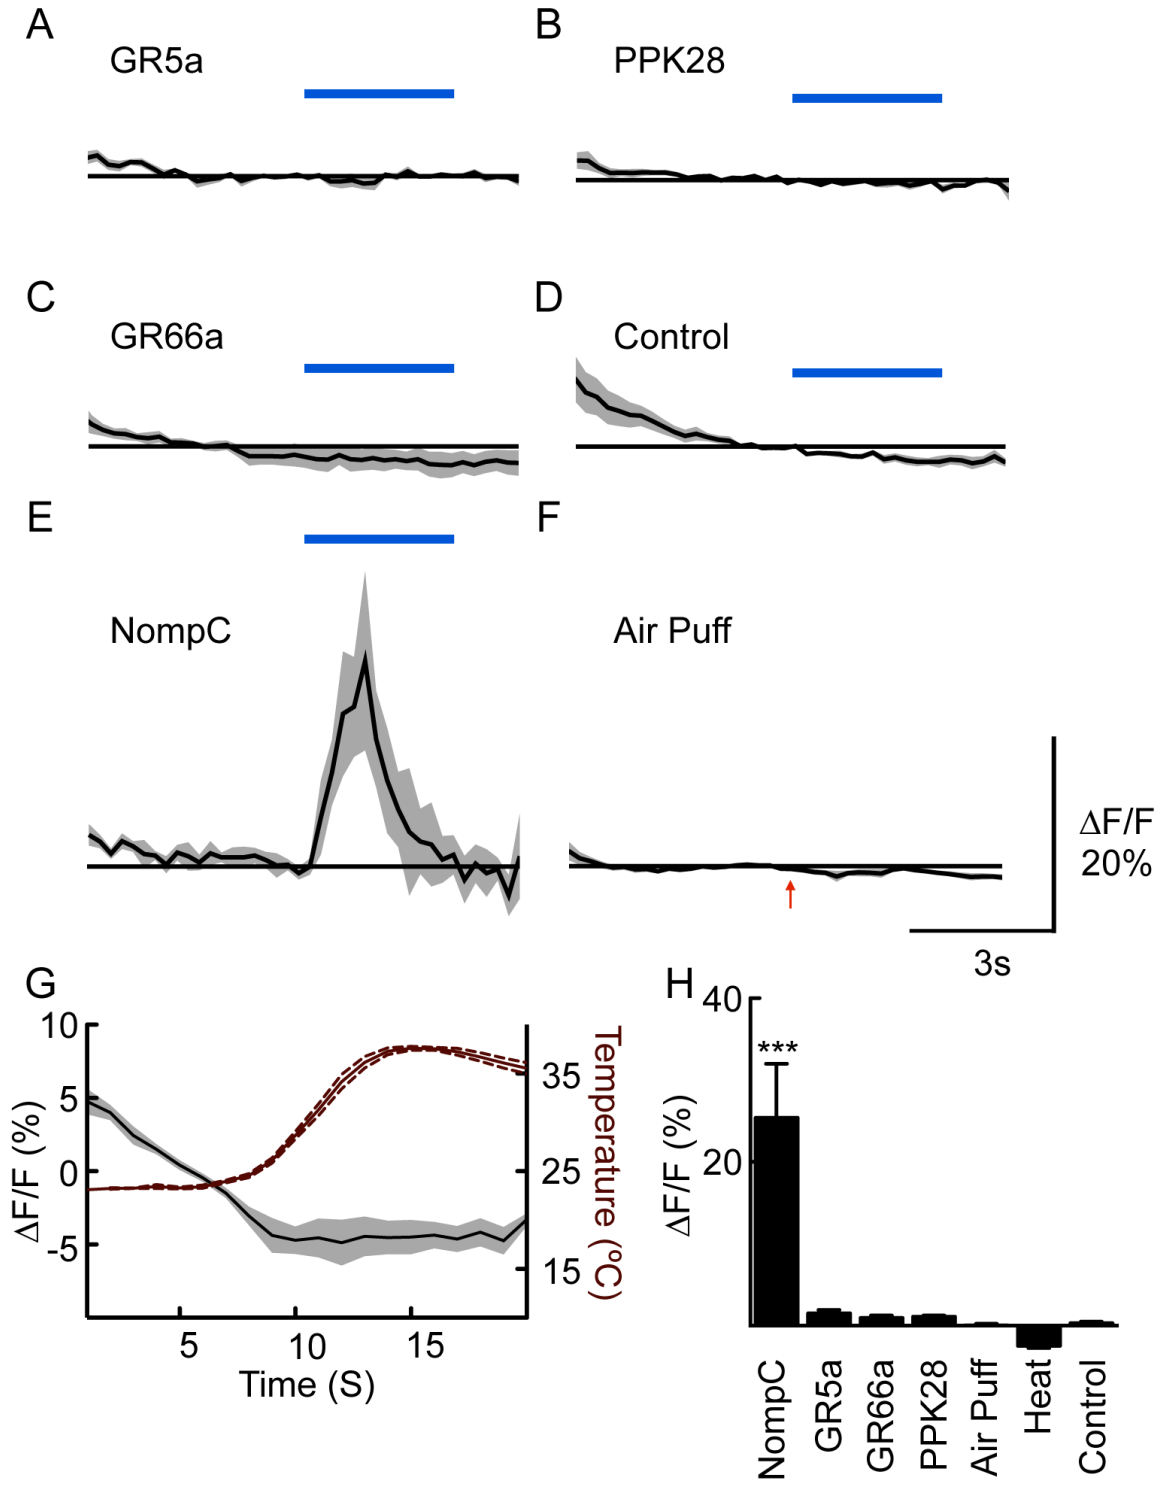

**Figure S3: PER<sub>in</sub> neurons do not respond to channelrhodopsin-2 (ChR2)-mediated stimulation of gustatory neurons, related to Figure 4.**

A-E. Stimulation of sugar-sensing (A), water-sensing (B), bitter-sensing (C), and no (D) sensory neurons while monitoring GCaMP3 responses in PER<sub>in</sub> dendrites. Flies were prepared in an identical manner to those in NompC-ChR2 experiments (data from Figure 4D is shown as a reference in panel E), with identical light stimulation (blue bar).

F. A gentle puff of air (red arrow) was delivered to legs while monitoring GCaMP3 responses in PER<sub>in</sub> dendrites. Air was delivered manually through a glass capillary.

G. Leg sensory neurons were stimulated using a heat probe to activate thermosensitive neurons.  $\Delta F/F$  values are shown in gray (left axis), and temperature values of the heat probe are shown in red (right axis).

H. Summary data of maximum  $\Delta F/F$  for each stimulation. n=6-8 flies per genotype, mean $\pm$ SEM, ANOVA with post-hoc Tukey test, \*\*\*P<0.001.

For GCaMP3 traces, lines and shaded areas represent mean $\pm$ SEM. Flies used were *UAS-GCaMP3; Sensory-LexA* (GR5a, PPK28, GR66a)/*E564-Gal4*, *UAS-GCaMP3; LexAop-ChR2*, *UAS-GCaMP3*. Control flies used lacked a sensory LexA driver.

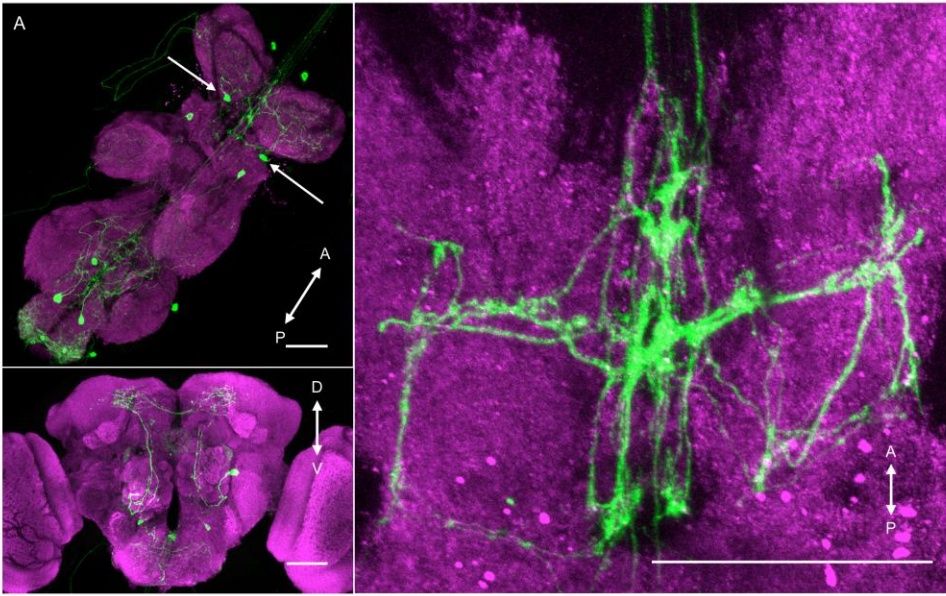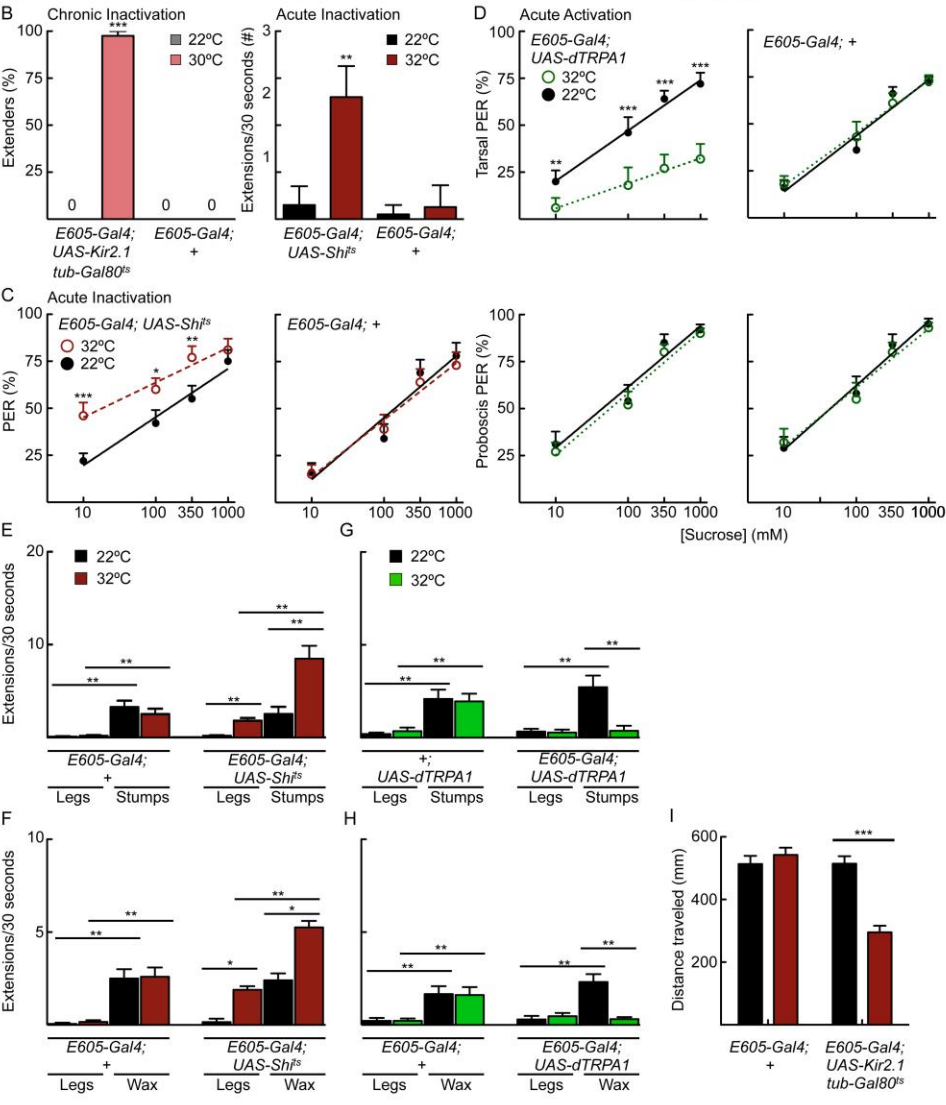

**Figure S4. A second Gal4 line, *E605-Gal4*, containing PER<sub>in</sub> neurons displays similar behavioral phenotypes, related to Figure 7.**

A. Expression of *UAS-CD8-GFP* in *E605-Gal4* neurons in VNC (top left) and central brain (bottom left). PER<sub>in</sub> is labeled (top left, arrows) and dendrites in VNC are shown (right). Scale bars are 50µm.

B. Chronically silencing neurons in *E605-Gal4; UAS-Kir, tub-Gal80<sup>ts</sup>* (left) produced constitutive proboscis extension in nearly 100% of animals, a phenotype not observed in *E605-Gal4* flies and non-induced flies (*E605-Gal4; UAS-Kir, tub-Gal80<sup>ts</sup>*, 22°C). 0 indicates that no flies showed proboscis extension. n=20-25 flies/genotype, mean±95%CI, Fisher's exact test, \*\*\*P<0.001. Acutely silencing neurons in *E605-Gal4; UAS-Shi<sup>ts</sup>* flies (right) increased spontaneous proboscis extensions (32°C, red bars) compared to genetic controls at permissive temperature (22°C, black bars) or *E605-Gal4* controls. n=24 flies, mean±SEM, student's t-test, \*\*P<0.01.

C. Proboscis extension response to sucrose (10-1000mM) in *E605-Gal4, UAS-Shi<sup>ts</sup>* (left) and *E605-Gal4* flies (right) at permissive (black) and restrictive temperatures (red). n=30 flies, mean±95% CI, Fisher's exact test, \*\*\*P<0.001, \*\*P<0.01, \*P<0.05.

D. Proboscis extension response to tarsal (top) or proboscis (bottom) stimulation in *E605-Gal4, UAS-dTRPA1* (left) and *E605-Gal4* control flies (right) at 22°C (black) and 32°C (green). n=30 flies/condition, mean±95% CI, Fisher's exact test, \*\*\*P<0.001, \*\*P<0.01.

E. *E605-Gal4; UAS-Shi<sup>ts</sup>* flies and *E605-Gal4* or *UAS-Shi<sup>ts</sup>* flies with or without legs (legs vs. stumps) at permissive (22°C, black bars) and restrictive (32°C, red bars) temperatures. Removal of legs in control flies caused an increase in spontaneous proboscis extensions, which was similar at both temperatures. Removal of legs in *E605-Gal4, UAS-Shi<sup>ts</sup>* flies also increased spontaneous extensions, and was greatly enhanced at restrictive temperature. n=15-19 flies/condition, mean±95% CI, Fisher's exact test, \*\*\*P<0.001, \*\*P<0.01.

F. Fly legs were immobilized with wax and proboscis extensions were examined at permissive (black bars) and restrictive (red bars) temperatures. n=16-19 flies, mean±95% CI, Fisher's exact test, \*\*P<0.01, \*P<0.05.

G. *UAS-dTRPA1* controls and *E605-Gal4; UAS-dTRPA1* flies with or without legs (legs vs. stumps) at 22°C (black) and 32°C (green). Removal of legs in *E605-Gal4, UAS-dTRPA1* flies increased spontaneous extensions, but this effect was abolished at 32°C upon dTRPA1 activation. n=14-19 flies, mean±95% CI, Fisher's exact test, \*\*P<0.01.

H. Activating E605 neurons abolished the increase in spontaneous proboscis extensions caused by leg immobilization (wax). n=17-20 flies/condition, all data is mean±SEM, ANOVA with Tukey post-hoc test, \*\*P<0.01.

I. *E605-Gal4; UAS-Kir2.1, tub-Gal80<sup>ts</sup>* flies show reduced movement when compared to *E605-Gal4; UAS-Kir2.1, tub-Gal80<sup>ts</sup>* controls at 22°C or *E605-Gal4* controls. n=20flies/condition, mean±SEM, ANOVA with Tukey post hoc test, \*\*\*P<0.001.

**Video S1. Comparison of PER<sub>in</sub> and sugar sensory projections, related to Figure S2.**

Ventral nerve cord showing PER<sub>in</sub> (green) and sugar gustatory axons (red). To generate 3d comparisons between PER<sub>in</sub> dendrites and sensory axons, confocal stacks of *E564-Gal4*, *GR5a-Gal4*, *UAS-GFP* flies were generated. PER<sub>in</sub> dendrites and gustatory sensory neuron axons were masked and pseudo-colored (ImageJ) to remove the other cell types found in E564 and allow for easier comparisons. Video is 225x225x82μm.

**Video S2. Comparison of PER<sub>in</sub> and bitter sensory projections, related to Figure S2.**

Ventral nerve cord showing PER<sub>in</sub> (green) and bitter gustatory axons (red). To generate 3d comparisons between PER<sub>in</sub> dendrites and sensory axons, confocal stacks of *E564-Gal4*, *GR66a-Gal4*, *UAS-GFP* flies were generated. PER<sub>in</sub> dendrites and gustatory sensory neuron axons were masked and pseudo-colored (ImageJ) to remove the other cell types found in E564 and allow for easier comparisons. Video is 225x225x64μm.
